# Supplementary material for: The catalytic decomposition of nitrous oxide and the NO + CO reaction over Ni/Cu dilute and single atom alloy surfaces: first-principles microkinetic modelling
Source: Royal Society of Chemistry journal article supplement (doi:10.1039/d1cy00011j), 2021-01-01
Supplement: d1cy00011j1.pdf [file d1cy00011j1.pdf]

# **Supporting Information for**

## **The Catalytic Decomposition of Nitrous Oxide and the NO**

### **+ CO Reaction over Ni/Cu Dilute and Single Atom Alloy**

### **Surfaces: First-principles Microkinetic Modelling**

Konstantinos G. Papanikolaou and Michail Stamatakis\*

*Thomas Young Centre and Department of Chemical Engineering, University College London,*

*Roberts Building, Torrington Place, London WC1E 7JE, UK*

# 1. Adsorption of N<sub>2</sub>O on Rh(111), Cu(111), Ni/Cu(111) SAA and Ni<sub>2</sub>Cu(111)

Figure S1 shows the six identified N<sub>2</sub>O adsorption structures, and Table S1 summarises the computed adsorption energies and bond lengths.

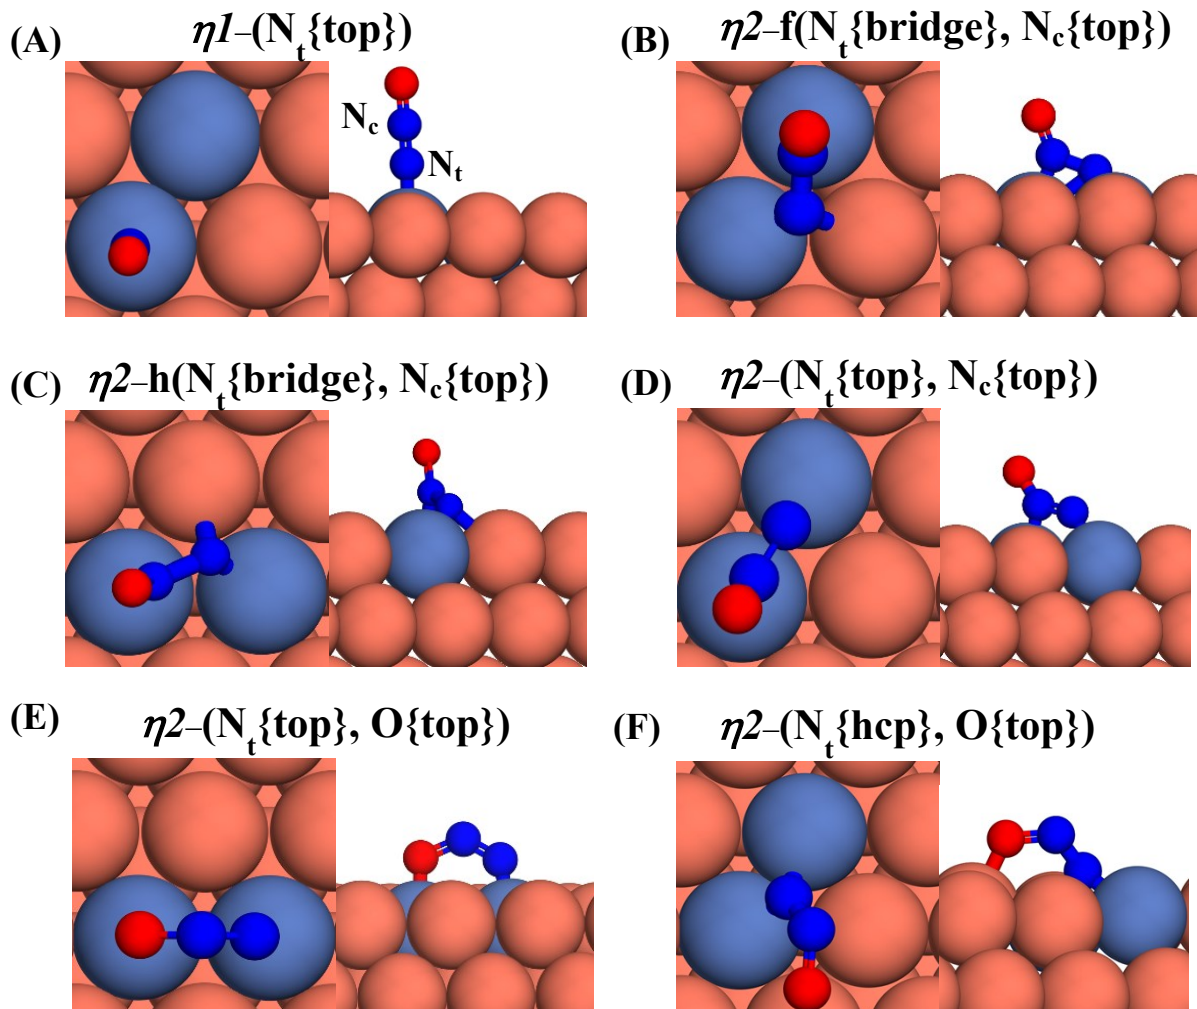

**Figure S1.** Top and side views of (A)  $\eta 1-(N_t\{\text{top}\})$ ; (B)  $\eta 2-f(N_t\{\text{bridge}\}, N_c\{\text{top}\})$ ; (C)  $\eta 2-h(N_t\{\text{bridge}\}, N_c\{\text{top}\})$ ; (D)  $\eta 2-(N_t\{\text{top}\}, N_c\{\text{top}\})$ ; (E)  $\eta 2-(N_t\{\text{top}\}, O\{\text{top}\})$  and (F)  $\eta 2-(N_t\{\text{hcp}\}, O\{\text{top}\})$  adsorption structure. On the side view of (a) we highlight the terminal ( $N_t$ ) and central ( $N_c$ ) nitrogen atoms. Ni, Cu, N and O atoms are shown in purple, orange, blue and red, respectively. The adsorption geometries are shown over Ni<sub>2</sub>Cu(111), but they are representative for all surfaces

**Table S1.** Adsorption energies (in eV) and bond distances (in Å) for the different N<sub>2</sub>O\* adsorption geometries over the investigated surfaces. The adsorption energies and bond distances that correspond to the most stable adsorption structure(s) for each surface are shown in bold. A dash indicates either that the adsorption structure is not stable on the specific surface or that it is not a minimum on the potential energy surface (i.e. there was an imaginary frequency in the vibrational analysis). For comparison:  $d_{N-N} = 1.14$  Å and  $d_{N-O} = 1.20$  Å for gas N<sub>2</sub>O.

| Adsorption Structure                                                                                | Property        | Rh(111)      | Cu(111)      | Ni/Cu(111) SAA | Ni <sub>2</sub> Cu(111) |
|-----------------------------------------------------------------------------------------------------|-----------------|--------------|--------------|----------------|-------------------------|
| <b><math>\eta 1-(N_t\{\text{top}\})</math></b><br>(denoted as <b><math>\eta 1</math></b> )          | $E_{ads}(N_2O)$ | -0.71        | -0.21        | <b>-0.70</b>   | -0.68                   |
|                                                                                                     | $d_{N-O}$       | 1.20         | 1.20         | <b>1.20</b>    | 1.21                    |
|                                                                                                     | $d_{N-N}$       | 1.15         | 1.15         | <b>1.15</b>    | 1.15                    |
| $\eta 2-f(N_t\{\text{bridge}\}, N_c\{\text{top}\})$<br>(denoted as <b><math>\eta 2NbNt</math></b> ) | $E_{ads}(N_2O)$ | <b>-0.83</b> | +0.15        | -0.43          | <b>-0.74</b>            |
|                                                                                                     | $d_{N-O}$       | <b>1.22</b>  | 1.23         | 1.23           | <b>1.23</b>             |
|                                                                                                     | $d_{N-N}$       | <b>1.35</b>  | 1.29         | 1.29           | <b>1.31</b>             |
| $\eta 2-h(N_t\{\text{bridge}\}, N_c\{\text{top}\})$                                                 | $E_{ads}(N_2O)$ | <b>-0.83</b> | +0.15        | -0.41          | -0.73                   |
|                                                                                                     | $d_{N-O}$       | <b>1.22</b>  | 1.23         | 1.23           | 1.23                    |
|                                                                                                     | $d_{N-N}$       | <b>1.36</b>  | 1.29         | 1.28           | 1.30                    |
| <b><math>\eta 2-(N_t\{\text{top}\}, N_c\{\text{top}\})</math></b>                                   | $E_{ads}(N_2O)$ | -0.68        | +0.27        | –              | -0.62                   |
|                                                                                                     | $d_{N-O}$       | 1.25         | 1.23         | –              | 1.24                    |
|                                                                                                     | $d_{N-N}$       | 1.26         | 1.22         | –              | 1.25                    |
| $\eta 2-(N_t\{\text{top}\}, O\{\text{top}\})$<br>(denoted as <b><math>\eta 2NtOt</math></b> )       | $E_{ads}(N_2O)$ | -0.72        | -0.20        | -0.53          | -0.68                   |
|                                                                                                     | $d_{N-O}$       | 1.33         | 1.28         | 1.30           | 1.32                    |
|                                                                                                     | $d_{N-N}$       | 1.20         | 1.19         | 1.20           | 1.20                    |
| $\eta 2-(N_t\{\text{hcp}\}, O\{\text{top}\})$                                                       | $E_{ads}(N_2O)$ | –            | <b>-0.25</b> | -0.44          | <b>-0.73</b>            |
|                                                                                                     | $d_{N-O}$       | –            | <b>1.30</b>  | 1.31           | <b>1.32</b>             |
|                                                                                                     | $d_{N-N}$       | –            | <b>1.27</b>  | 1.25           | <b>1.27</b>             |

## 2. Electronic structure analyses of N<sub>2</sub>O adsorption modes

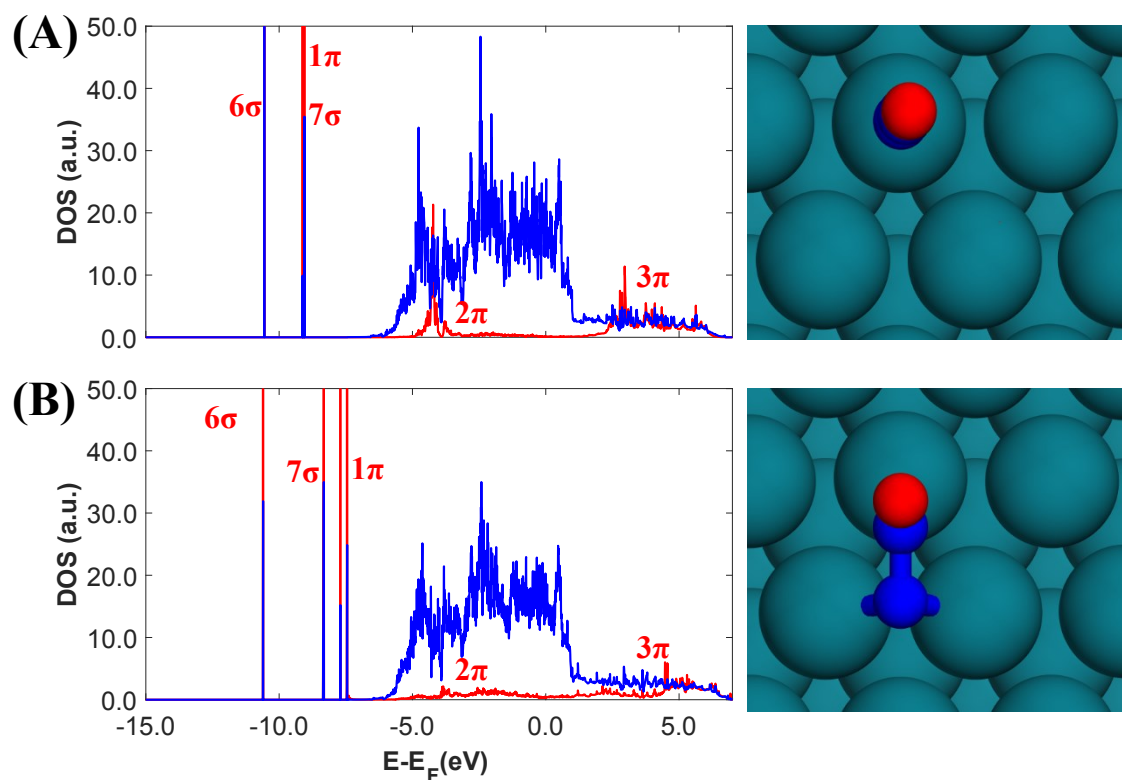

**Figure S2.** Projected density of states for (A) the  $\eta I-(N_t\{top\})$ ; and (B) the  $\eta 2-h(N_t\{bridge\}, N_c\{top\})$  on Rh(111). The red line is the N<sub>2</sub>O\* contribution and the blue line is the metal contribution (only Rh surface atoms). The relaxed adsorption structures are shown on the right of each panel. Rh, O and N atoms are shown in dark green, red and blue.

### 3. Reaction path for N<sub>2</sub>O formation and decomposition

Figure S3 shows the reaction path for the decomposition of N<sub>2</sub>O to either NO\* + N\* or N<sub>2</sub>\* + O\*. The energies presented are referenced to a non-interacting N<sub>2</sub>O molecule in the gas-phase and a clean Rh(111) slab. For an accurate comparison of our results to the work of Paul et al.,<sup>1</sup> all the energies presented include the zero point energy (ZPE) correction, which can be introduced by calculating the energy of an adsorbed state as

$$E_{DFT,s} = E_{DFT}^{Slab+N_2O} - E_{DFT}^{Slab} - E_{DFT}^{N_2O(g)} + \hbar \left( \sum_{i=1}^9 \frac{\omega_i}{2} - \sum_{i=1}^3 \frac{\omega_{N_2O,i}}{2} \right), \quad (S1)$$

where  $E_{DFT,s}$  is the energy of a state  $s$ ;  $E_{DFT}^{Slab+N_2O}$ ,  $E_{DFT}^{Slab}$  and  $E_{DFT}^{N_2O(g)}$  are the DFT energies for a Rh(111) slab whereon N<sub>2</sub>O is adsorbed, clean Rh(111) slab and a gas-phase N<sub>2</sub>O molecule;  $\hbar$  is the reduced Planck constant;  $\omega_{N_2O,i}$  is the angular frequency of the  $i^{th}$  mode of gas-phase N<sub>2</sub>O and  $\omega_i$  is the angular frequency of the  $i^{th}$  mode of N<sub>2</sub>O in an adsorbed state.

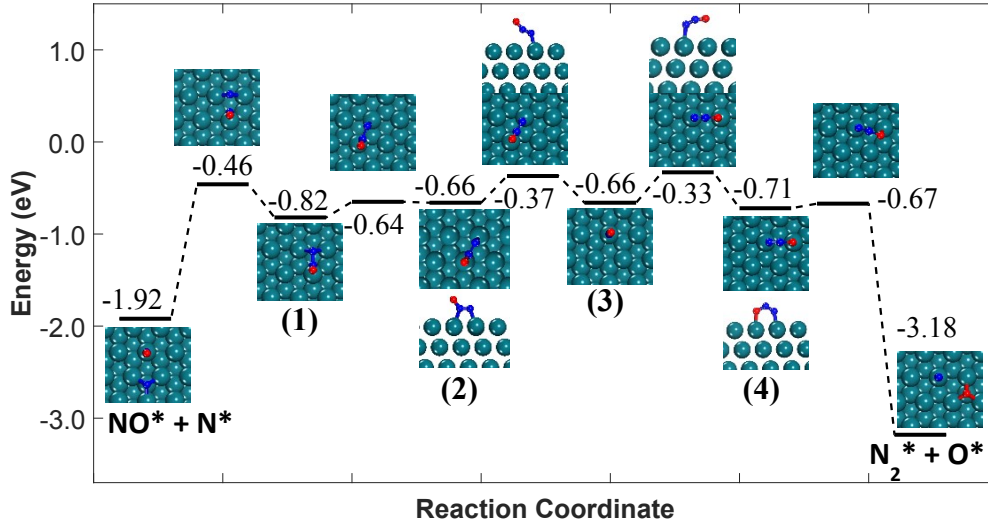

**Figure S3.** Reaction path for the decomposition of N<sub>2</sub>O\* either to NO\* + N\* or to N<sub>2</sub>\* + O\*. The energy values are ZPE-corrected. The numbering of the adsorbed configurations of N<sub>2</sub>O is as follows: (1)  $\eta^2$ -f(N<sub>t</sub>{bridge}, N<sub>c</sub>{top}), (2)  $\eta^2$ -(N<sub>t</sub>{top}, N<sub>c</sub>{top}), (3)  $\eta^1$ -(N<sub>t</sub>{top}) and (4)  $\eta^2$ -(N<sub>t</sub>{top}, O{top}). Rh, O and N atoms are shown in dark green, red and blue, respectively.

#### 4. NO\* – NO\* repulsive interactions

To demonstrate the NO\* – NO\* repulsive interactions, we plot the average adsorption energy of NO\* over Rh(111) for different NO\* surface coverages. As seen, at increasing surface coverage the NO\* binding strength diminishes (i.e. less exothermic adsorption).

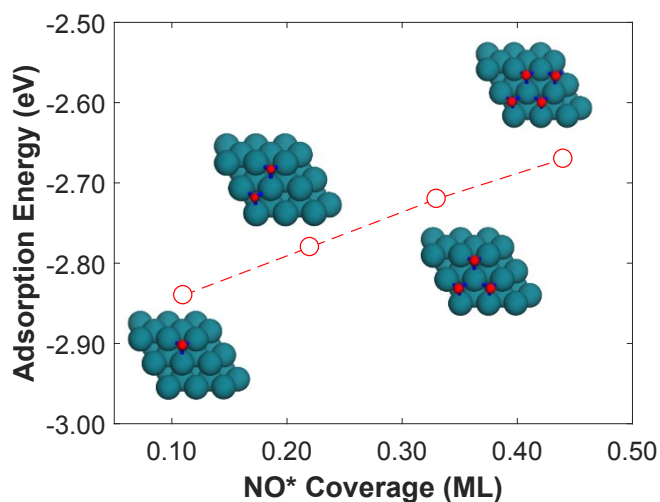

**Figure S4.** Average adsorption of NO\* for various coverages. Rh, O and N atoms are shown in dark green, red and blue, respectively.

#### 5. N<sub>2</sub>O\* formation *via* (NO)<sub>2</sub>\* on Ni<sub>3</sub>Cu(111)

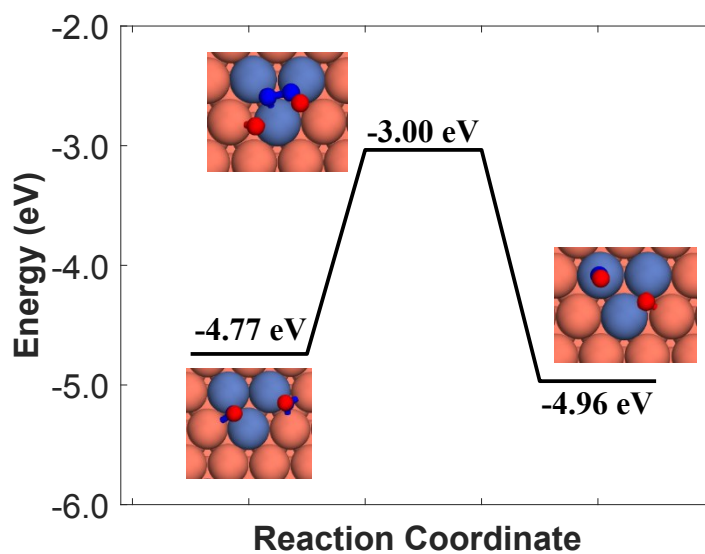

**Figure S5.** N<sub>2</sub>O\* formation *via* (NO)<sub>2</sub>\* on Ni<sub>3</sub>Cu(111).

## 6. Side views of the states within the $\text{N}_2\text{O}^*$ formation and decomposition reaction pathways

The following figures show the side view of the different states that are involved in the  $\text{N}_2\text{O}^*$  formation/decomposition pathways (see Figure 2, Figure 3 and Figure 4 in the main text). The images are for the  $\text{Ni}_2\text{Cu}(111)$  surface, but in the vast majority of cases they are representative for all the Cu-based surfaces.

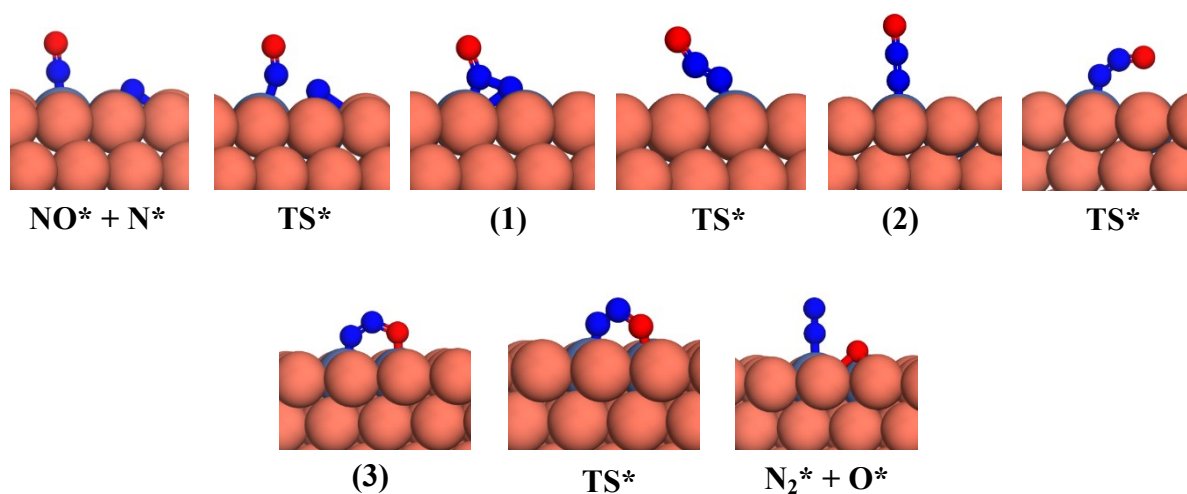

**Figure S6.** Side views of the states in Figure 2 (B) of the main text. Ni, Cu, O and N atoms are shown in purple, orange, red and blue, respectively.

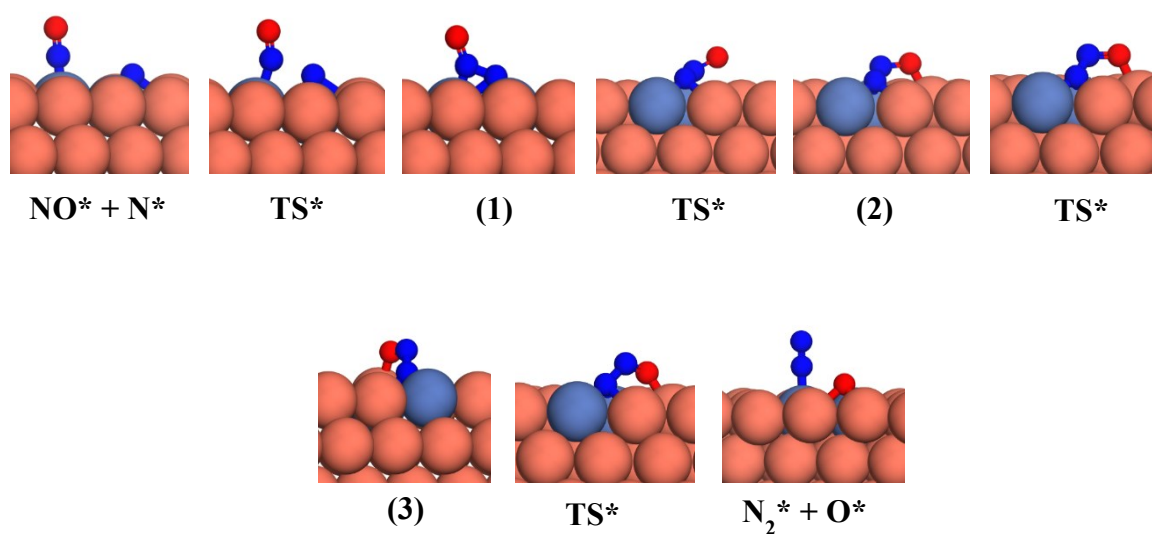

**Figure S7.** Side views of the states in Figure 3 (C) of the main text. Ni, Cu, O and N atoms are shown in purple, orange, red and blue, respectively.

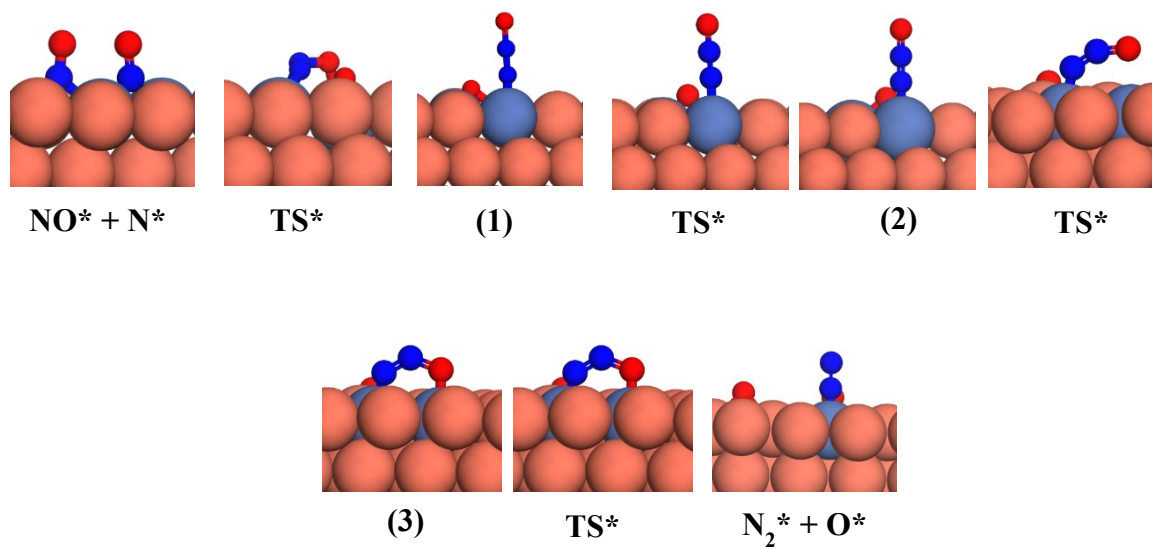

**Figure S8.** Side views of the states in Figure 4 (C) of the main text. Ni, Cu, O and N atoms are shown in purple, orange, red and blue, respectively.

## 7. O<sub>2</sub>\* association and NO<sub>2</sub>\* formation

Figure S9 shows the initial, transition and final states for the formation of O<sub>2</sub>\* from two O\* adatoms. Also shown are the computed DFT energies for each structure.

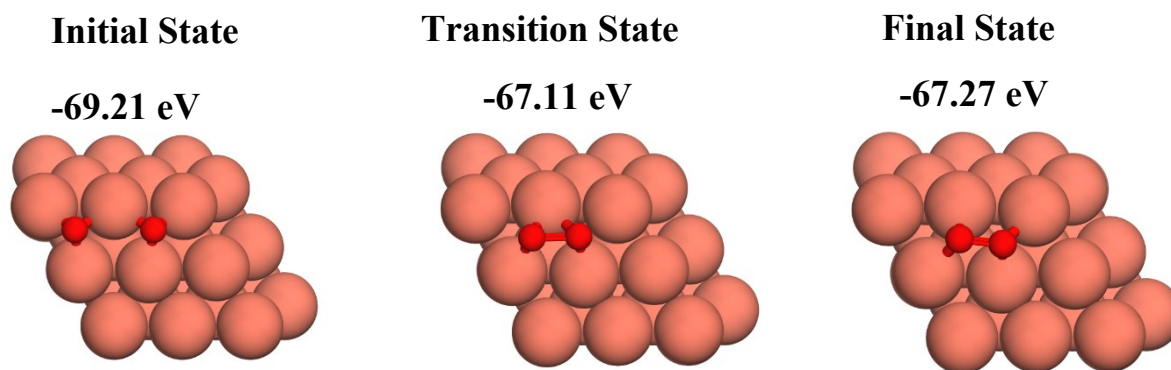

**Figure S9.** Top view of initial, transition and final states for the formation of O<sub>2</sub>\* on Cu(111). Cu and O atoms are shown in orange and red, respectively.

Regarding the NO<sub>2</sub>\* formation, we find that on Cu-based the forward barrier is always larger than 0.70 eV, while the reverse barrier (i.e. NO<sub>2</sub>\* dissociation) is always smaller than 0.30 eV. Our data indicates that the formation of NO<sub>2</sub>\* is neither kinetically nor thermodynamically favoured. The most stable final state for all the three surfaces is the so-called  $\mu$ -N,O-nitrito adsorption mode, whose stability is experimentally confirmed on other coinage metal surfaces.<sup>2</sup> We also compute the adsorption energies of NO<sub>2</sub>\* in the  $\mu$ -N,O-nitrito structure on the Cu-based surfaces (Table S2). The obtained values imply that even if NO<sub>2</sub>\* is formed on the surface its dissociation will be dramatically more favourable than its desorption, thereby corroborating our reaction mechanism, which does not take into account the formation of NO<sub>2</sub>\*.

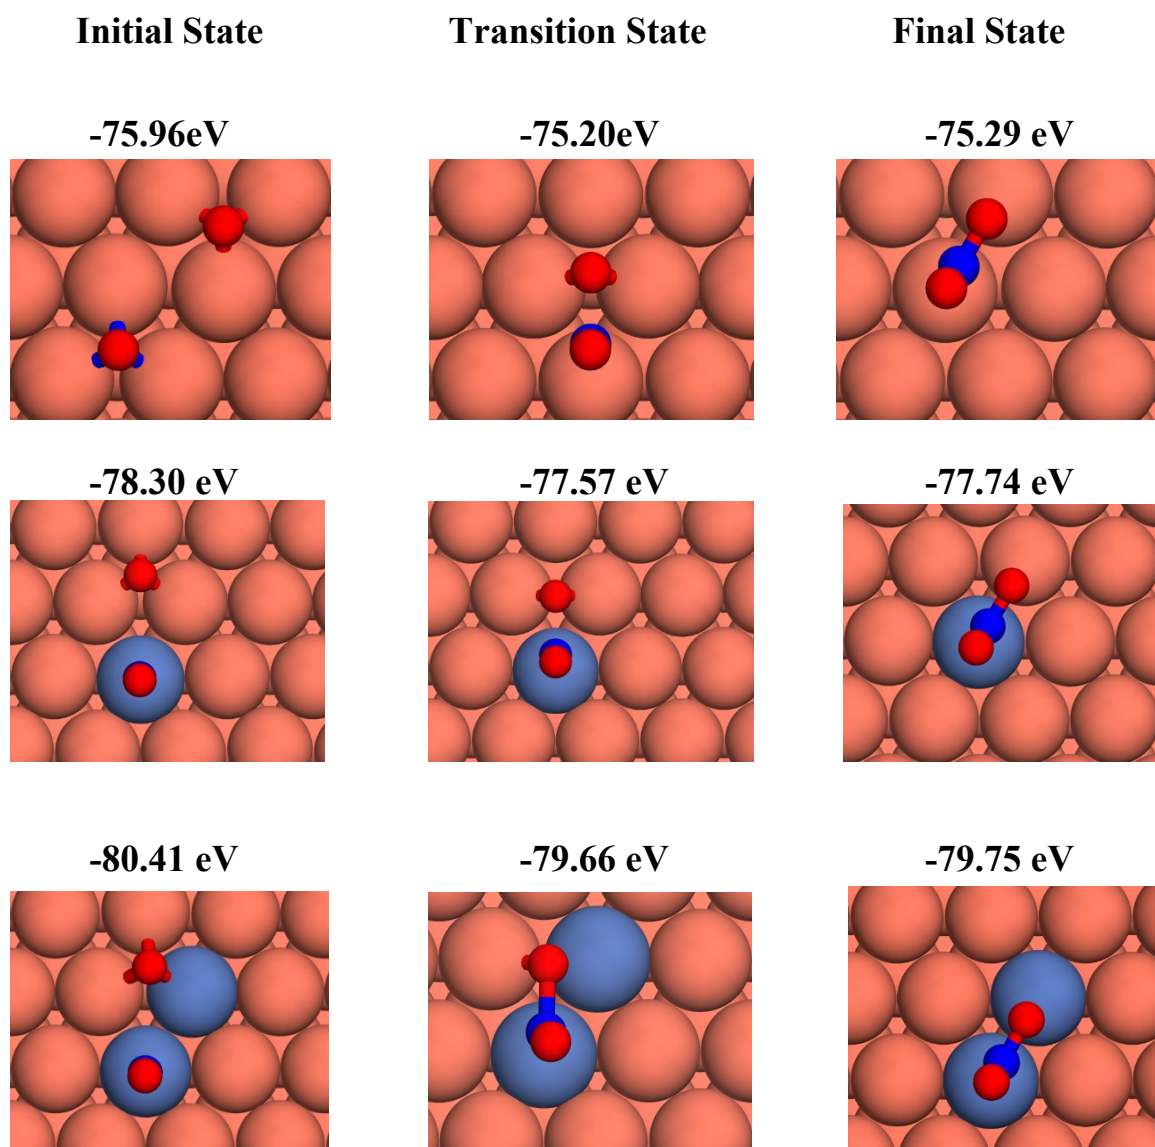

**Figure S10.** Top view of initial, transition and final states for the formation of  $\text{NO}_2^*$  on Cu(111), Ni/Cu(111) SAA and  $\text{Ni}_2\text{Cu}$ (111) surfaces. Ni, Cu, O and N atoms are shown in purple, orange, red and blue, respectively.

**Table S2.** Adsorption energies for NO<sub>2</sub>\* in  $\mu$ -N,O-nitrito adsorption structure on Cu-based surfaces. Note that the gas-phase calculation for NO<sub>2(g)</sub> was spin-polarised.

| Surface                 | E <sub>ads</sub> (NO <sub>2</sub> ) |
|-------------------------|-------------------------------------|
| Cu(111)                 | -1.70 eV                            |
| Ni/Cu(111) SAA          | -2.10 eV                            |
| Ni <sub>2</sub> Cu(111) | -2.30 eV                            |

## 8. Activity plot for Cu(111) at “low temperatures”

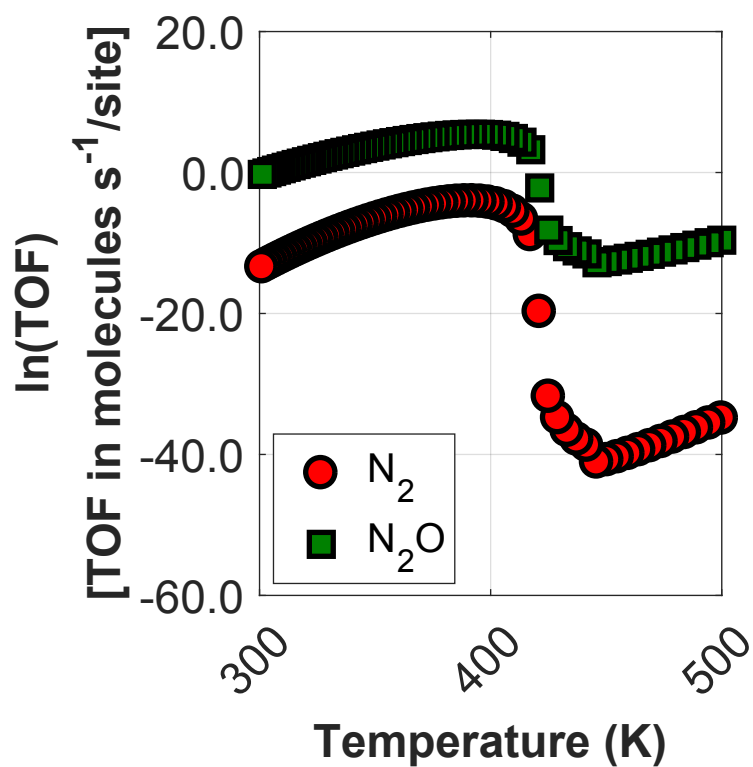

**Figure S11.** Activity of Cu(111) within the temperature range of 300 K – 500 K (Low-temperature range).

## 9. Explanation for the selectivity peak on Ni/Cu bimetallic alloys

Figure S12 (A) and (B) shows that the selectivity peak of  $\text{Ni}_2\text{Cu}(111)$  is unaffected by changes to the activation barrier to the formation of  $\text{N}_2^*$  (R16 in Table 2 in the main text) and the dimerization reaction (R15 in Table 2 in the main text) on  $\text{Ni}^*$ . On the contrary, the peak (which appears between 950 K and 1400 K) disappears upon increasing the activation barrier for the formation of  $\text{N}_2\text{O}^*$  (R9 in Table 2 in the main text) and  $\text{NO}^*$  dissociation (R8 in Table 2 in the main text) reactions on  $\text{Ni}^*$ . Therefore, the selectivity spike for Ni/Cu SAA and  $\text{Ni}_2\text{Cu}$  in Figure 7 (A) is associated only with the latter two reactions.

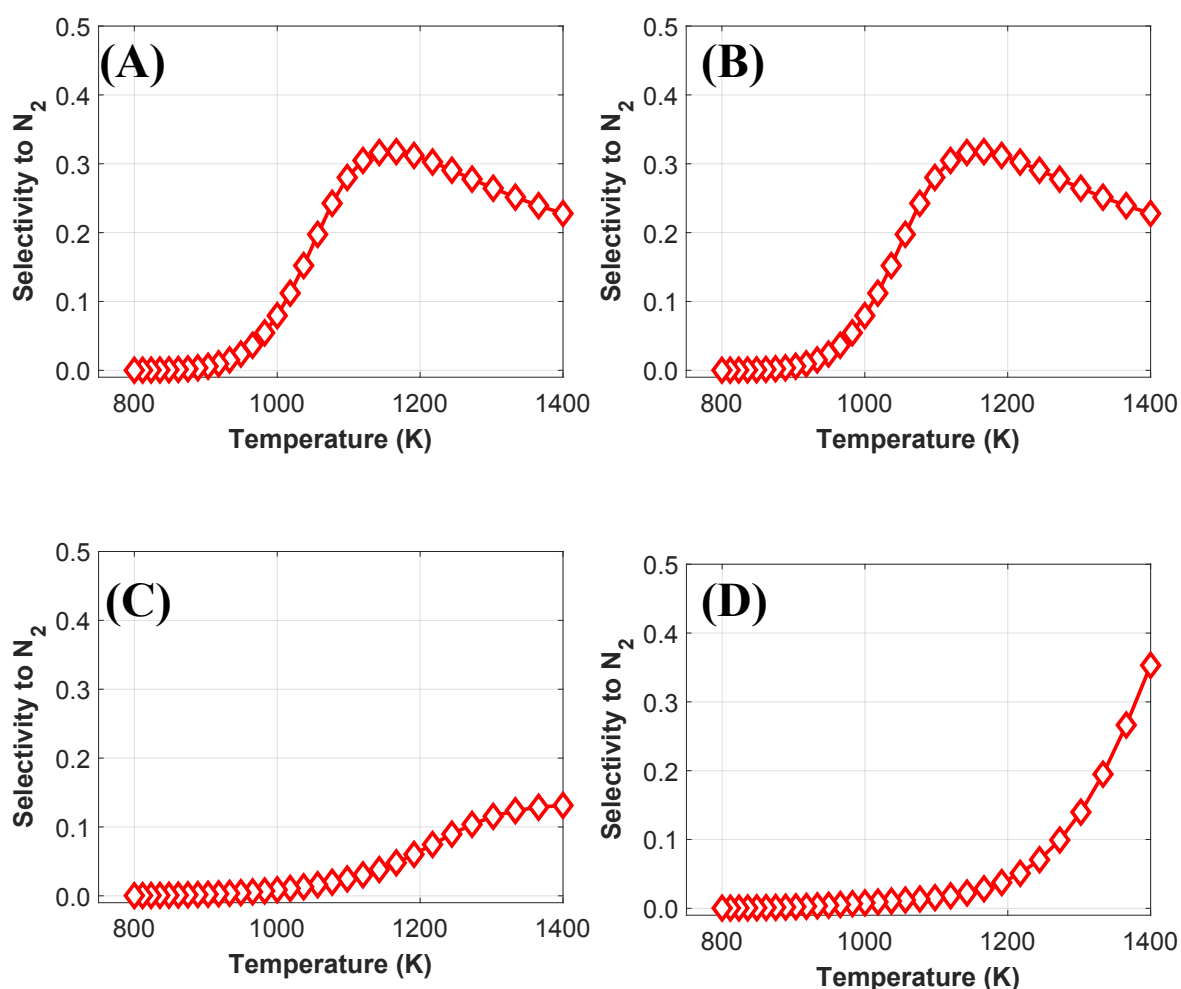

**Figure S12.** Predicted selectivity to  $\text{N}_2$  after setting a large activation barrier (i.e. 2.5 eV) for (A) the formation of  $\text{N}_2^*$  on  $\text{Ni}^*$ ; (B) the dimerization reaction on  $\text{Ni}^*$ ; (C) the direct dissociation of  $\text{NO}^*$  on  $\text{Ni}^*$ ; and (D) the formation of  $\text{N}_2\text{O}^*$  on  $\text{Ni}^*$

## 10. Sites involved in surface reactions over Ni/Cu bimetallic alloys

Several elementary events in our microkinetic model involve two sites, which may be of different type on the Ni/Cu bimetallic alloys. On the latter surfaces, the two-site reactions (see Table 2) can happen either on Cu sites, where the reactants and products are on Cu\*, or on pair of sites that include both Ni\* and Cu\*. Table S3 tabulates the two-site events of the NO + CO reaction along with the site types whereon the reactant and product adspecies are adsorbed in our model.

**Table S3.** Two-site events and sites where reactant and product species are adsorbed. The adsorption sites (i.e. either Ni\* or Cu\*) are shown in bold. Also in bold are the reaction numbers, which correspond to the numbers shown in Table 2 in the main text. Empty sites are denoted as Ni\* or Cu\*. For occupied sites, the adsorbate is specified followed by the site type in parenthesis.

| Reaction                                                                   | Reactant 1                                    | Reactant 2         | Product 1                                     | Product 2         |
|----------------------------------------------------------------------------|-----------------------------------------------|--------------------|-----------------------------------------------|-------------------|
| NO* + * $\leftrightarrow$ N* + O*                                          |                                               |                    |                                               |                   |
| <b>(R8)</b>                                                                | NO* ( <b>Ni*</b> )                            | <b>Cu*</b>         | N* ( <b>Ni*</b> )                             | O* ( <b>Cu*</b> ) |
| NO* + N* $\leftrightarrow$ N <sub>2</sub> O* $\eta 2NbNt$ + *              |                                               |                    |                                               |                   |
| <b>(R9)</b>                                                                | NO* ( <b>Ni*</b> )                            | N* ( <b>Cu*</b> )  | N <sub>2</sub> O* $\eta 2NbNt$ ( <b>Ni*</b> ) | <b>Cu*</b>        |
| N <sub>2</sub> O* $\eta 2NtOt$ + * $\leftrightarrow$ N <sub>2</sub> * + O* |                                               |                    |                                               |                   |
| <b>(R12)</b>                                                               | N <sub>2</sub> O* $\eta 2NtOt$ ( <b>Ni*</b> ) | <b>Cu*</b>         | N <sub>2</sub> * ( <b>Ni*</b> )               | O* ( <b>Cu*</b> ) |
| N <sub>2</sub> O* $\eta 2NbNt$ + * $\leftrightarrow$ N <sub>2</sub> * + O* |                                               |                    |                                               |                   |
| <b>(R13)</b>                                                               | N <sub>2</sub> O* $\eta 2NbNt$ ( <b>Ni*</b> ) | <b>Cu*</b>         | N <sub>2</sub> * ( <b>Ni*</b> )               | O* ( <b>Cu*</b> ) |
| CO* + O* $\leftrightarrow$ CO <sub>2</sub> * + *                           |                                               |                    |                                               |                   |
| <b>(R14)</b>                                                               | CO* ( <b>Ni*</b> )                            | O* ( <b>Cu*</b> )  | CO <sub>2</sub> * ( <b>Ni*</b> )              | <b>Cu*</b>        |
| NO* + NO* $\leftrightarrow$ N <sub>2</sub> O* $\eta l$ + O*                |                                               |                    |                                               |                   |
| <b>(R15)</b>                                                               | NO* ( <b>Ni*</b> )                            | NO* ( <b>Cu*</b> ) | N <sub>2</sub> O* $\eta l$ ( <b>Ni*</b> )     | O* ( <b>Cu*</b> ) |
| N* + N* $\leftrightarrow$ N <sub>2</sub> * + *                             |                                               |                    |                                               |                   |
| <b>(R16)</b>                                                               | N* ( <b>Ni*</b> )                             | N* ( <b>Cu*</b> )  | N <sub>2</sub> * ( <b>Ni*</b> )               | <b>Cu*</b>        |

## 11. Computed adsorption energy for N<sub>2</sub>O\* using different vdW functionals

Table S4 tabulates the  $E_{ads}(\text{N}_2\text{O})$  for the three different adsorption geometries that are considered in the microkinetic model, computed using different exchange-correlation (XC) functionals, in particular: optPBE–vdW, optB86b–vdW, BEEF–vdW, and the Tkatchenko–Scheffler method (DFT–TS). Our results suggest that binding strengths that are predicted by different XC vdW functionals are considerably different, and this a known and non-trivial challenge in DFT calculations where nonlocal effects are accounted for.<sup>3</sup> Therefore, the result of microkinetic simulations will strongly depend on the performance of the selected XC functional. For example, for the NO + CO reaction, one should expect that the selectivity peak of Figure 7 (A) will be higher than 0.65 if optPBE–vdW is used. By contrast, values of 0.25 or less can be expected if the DFT–TS or BEEF–vdW are employed.

**Table S4.** Cu lattice constants and N<sub>2</sub>O\* adsorption energies (in eV) using different vdW treatments. Adsorption energies are presented only for the three N<sub>2</sub>O\* geometries that are taken into account in the microkinetic model of the NO + CO reaction and are computed on the Ni<sub>2</sub>Cu(111) surface. Lattice constants are reported in Å and the experimentally determined value is 3.596 Å.

| XC Functional | $E_{ads}(\eta 1)$ | $E_{ads}(\eta 2NbNt)$ | $E_{ads}(\eta 2NtOt)$ | Lattice Constant |
|---------------|-------------------|-----------------------|-----------------------|------------------|
|               |                   |                       |                       | (Cu)             |
| optPBE–vdW    | -0.93             | -0.91                 | -0.95                 | 3.648            |
| optB86b–vdW*  | -0.67             | -0.74                 | -0.68                 | 3.608            |
| DFT–TS        | -0.40             | -0.56                 | -0.48                 | 3.635            |
| BEEF–vdW      | -0.33 ± 0.14      | -0.17 ± 0.23          | -0.24 ± 0.31          | 3.661            |

\* used functional in this work

## References

- 1 J.-F. Paul, J. Pérez-Ramírez, F. Ample and J. M. Ricart, *J. Phys. Chem. B*, 2004, **108**, 17921–17927.
- 2 M. E. Bartram and B. E. Koel, *Surf. Sci.*, 1989, **213**, 137–156.
- 3 S. Gautier, S. N. Steinmann, C. Michel, P. Fleurat-Lessard and P. Sautet, *Phys. Chem. Chem. Phys.*, 2015, **17**, 28921–28930.
